# Supplementary material for: A Novel Inflammatory and Nutritional Prognostic Scoring System for Nonpathological Complete Response Breast Cancer Patients Undergoing Neoadjuvant Chemotherapy
Source: Hindawi journal article supplement (doi:10.1155/2022/8044550), 2022-12-16
Supplement: f1 [file 8044550.f1.zip]

This document certifies that the manuscript

**A novel inflammatory and nutritional prognostic score system for non-pathologic complete response breast cancer patients undergoing neoadjuvant chemotherapy**

prepared by the authors

**Cong Jiang, Yuting Xiu, Shiyuan Zhang, Xiao Yu, Kun Qiao, Yuanxi Huang**

was edited for proper English language, grammar, punctuation, spelling, and overall style by one or more of the highly qualified native English speaking editors at AJE.

This certificate was issued on **November 7, 2022** and may be verified on the [AJE website](#) using the verification code **1006-578B-9570-9B82-COC8**.

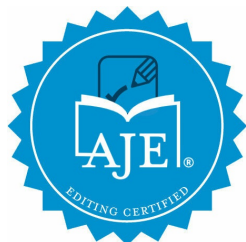

Neither the research content nor the authors' intentions were altered in any way during the editing process. Documents receiving this certification should be English-ready for publication; however, the author has the ability to accept or reject our suggestions and changes. To verify the final AJE edited version, please visit our verification page at [aje.com/certificate](#). If you have any questions or concerns about this edited document, please contact AJE at [support@aje.com](mailto:support@aje.com).
