# Supplementary material for: A Novel Inflammatory and Nutritional Prognostic Scoring System for Nonpathological Complete Response Breast Cancer Patients Undergoing Neoadjuvant Chemotherapy
Source: Dis Markers. 2022 Dec 16;2022:8044550. doi: 10.1155/2022/8044550 (PMC9788886; doi:10.1155/2022/8044550)
Supplement: Supplementary Materials — Table S1: the relationship between hematological parameters which were included into COX regression analysis, OS, and DFS. Certificate of English Editing: the first Certificate of English Editing. AJE editing certificate: the second Certificate of English Editing. [file 8044550.f1.zip]

Archive with 3 entries (3 files):
- AJE editing certificate.pdf
- Certificate of English Editing.pdf
- Table S1.docx
